# Supplementary material
Source: PubMed Central journal article supplement (PMC2678601)
Supplement: 0811684106_0811684106SI.pdf [file 0811684106_0811684106SI.pdf]

# Supporting Information

Stephenson et al. 10.1073/pnas.0811684106

## SI Text

**Plant Material.** The *Arabidopsis* (*Arabidopsis thaliana* L.) mutant lines used are in the Columbia background. The *pif3* mutant used in this study is an independently isolated T-DNA insertion allele obtained from SALK (030753; <http://signal.salk.edu/>) and is identical to *pif3-1* (1). The *pif1* mutant is a new allele from the Syngenta *Arabidopsis* Insertion Library (2) that has an insertion in the third exon, 5' of the bHLH domain (Fig. S1A). This *pif1* allele is therefore similar, but not identical, to *pif1-1* (3) and has been designated *pif1-101*. Northern blots probed with a 5' gene fragment confirmed that *pif1-101* does not accumulate any full length *PIF1* transcript. Hypocotyl measurements in continuous R and FR light demonstrated that both *pif1-101* and the new *pif3-1* were hypersensitive to red (Fig. S1B) and far-red (Fig. S1C) light with the *pif1pif3* double mutant showing an additive phenotype. These phenotypes are consistent with previous studies on *pif1* (4, 5) and *pif3* (1, 6) including the *pif1pif3* double mutant (4). The *pif1-2* and *pif3-3* mutants were kindly provided by P. Quail (University of California, Berkeley).

**Light Sources.** Broad band WL was provided directly at 110 or 310  $\mu\text{mol}\cdot\text{m}^{-2}\cdot\text{s}^{-1}$ , and at 10  $\mu\text{mol}\cdot\text{m}^{-2}\cdot\text{s}^{-1}$  through 2 layers of neutral density filter [#211; Lee Filters (Andover, UK)]. Narrow waveband light sources were provided by LED displays as described in ref. 7 with the following exception: Far-red light (FR) from the LEDs was passed through a single filter (#116; Lee Filters) to remove <700 nm to give a final fluence rate of 10  $\mu\text{mol}\cdot\text{m}^{-2}\cdot\text{s}^{-1}$ . Red light (R) was given at a fluence rate of 80  $\mu\text{mol}\cdot\text{m}^{-2}\cdot\text{s}^{-1}$ .

**Real-Time PCR.** RNA was extracted as described in ref. 8 with the following exception: Approximately 500  $\mu\text{g}$  of seedling material was snap frozen in liquid  $\text{N}_2$  before homogenization in 150  $\mu\text{L}$  of phenol (pH 4.8) and 500  $\mu\text{L}$  of "RNA Miniprep" buffer (100 mM NaCl; 10 mM Tris, pH 7.0; 1 mM EDTA; and 1% SDS) using an Ultra-Turrax T8 hand held homogenizer (IKA Labortechnik). The homogenizer was washed once in 70% ethanol (vol/vol) and twice in distilled water between extractions.

The forward (FOR) and reverse (REV) primers used were as follows: *CHLH* (At5g13630), FOR 5'-CTGGTCGTGACCCCTA-GAACAG-3', REV 5'-GATTGCCAGCTTCTTCTCTG-3'; *GUN4* (At3g59400), FOR 5'-CTCCATTGCCAATCTCAC-3', REV 5'-CCGAATCTACCATCACTGTG-3'; *HEMA1* (At1g58290), FOR 5'-CAAGAACTCTGCAGCTGATC-3', REV 5'-CCATTCAGCTTCAGGTATAGC-3'; *PIF1* (At2g20180), FOR 5'-GCTAGATGAAGCTATTGAGTACATGA-3', REV 5'-CTGCTGGTTTCGGTACAAAGA-3'; *PIF3* (At1g09530), FOR 5'-GAATCTGCTCAAGACAGGAAC-3', REV 5'-CTCGTTGACAGTAACAGGAGAC-3'; *CCA1* (At2g46830), FOR 5'-GATGATGTTGAGGCGGATG-3', REV 5'-TGGTGTTAACTGAGCTGTGAAG-3'; *LHY* (At1g01060), FOR 5'-GAGAGCGATGGACTGAGGA-3', REV 5'-CAATGTCGCCACTTACCTG-3'; *TOC1* (At5g61380) FOR 5'-TCTTCGCAGAATCCCTGTGAT-3', REV 5'-GCTGCACCTAGCTTCAAGCA-3'; *CAX1* (At2g38170) FOR 5'-AGCGGTTTTGCATGGTTGGTTG-3', REV 5'-CCCTTCATGTAGTGAGAACACC-3'; *YLS8* (At5g08290) FOR 5'-TTACTGTTTCGGTTGTTCTCCA-3', REV 5'-CACTGAATCATGTTTCAAGCAA-3'.

1. Kim J, et al. (2003) Functional characterization of phytochrome interacting factor 3 in phytochrome-mediated light signal transduction. *Plant Cell* 15:2399–2407.
2. Sessions A, et al. (2002) A high-throughput *Arabidopsis* reverse genetics system. *Plant Cell* 14:2985–2994.
3. Huq E, et al. (2004) Phytochrome-interacting factor 1 is a critical bHLH regulator of chlorophyll biosynthesis. *Science* 305:1937–1941.
4. Oh E, et al. (2004) PIL5, a phytochrome-interacting basic helix-loop-helix protein, is a key negative regulator of seed germination in *Arabidopsis thaliana*. *Plant Cell* 16:3045–3058.
5. Shen H, Moon J, Huq E (2005) PIF1 is regulated by light-mediated degradation through the ubiquitin-26S proteasome pathway to optimize photomorphogenesis of seedlings in *Arabidopsis*. *Plant J* 44:1023–1035.
6. Halliday KJ, Hudon M, Ni M, Qin M, Quail PH (1999) *poc1*: An *Arabidopsis* mutant perturbed in phytochrome signaling because of a T DNA insertion in the promoter of *PIF3*, a gene encoding a phytochrome-interacting bHLH protein. *Proc Natl Acad Sci USA* 96:5832–5837.
7. McCormac AC, Fischer A, Kumar AM, Söll D, Terry MJ (2001) Regulation of *HEMA1* expression by phytochrome and a plastid signal during de-etiolation in *Arabidopsis thaliana*. *Plant J* 25:549–561.
8. Stephenson PG, Terry MJ (2008) Light signalling pathways regulating the Mg-chelatase branchpoint of chlorophyll synthesis during de-etiolation in *Arabidopsis thaliana*. *Photochem Photobiol Sci* 7:1243–1252.

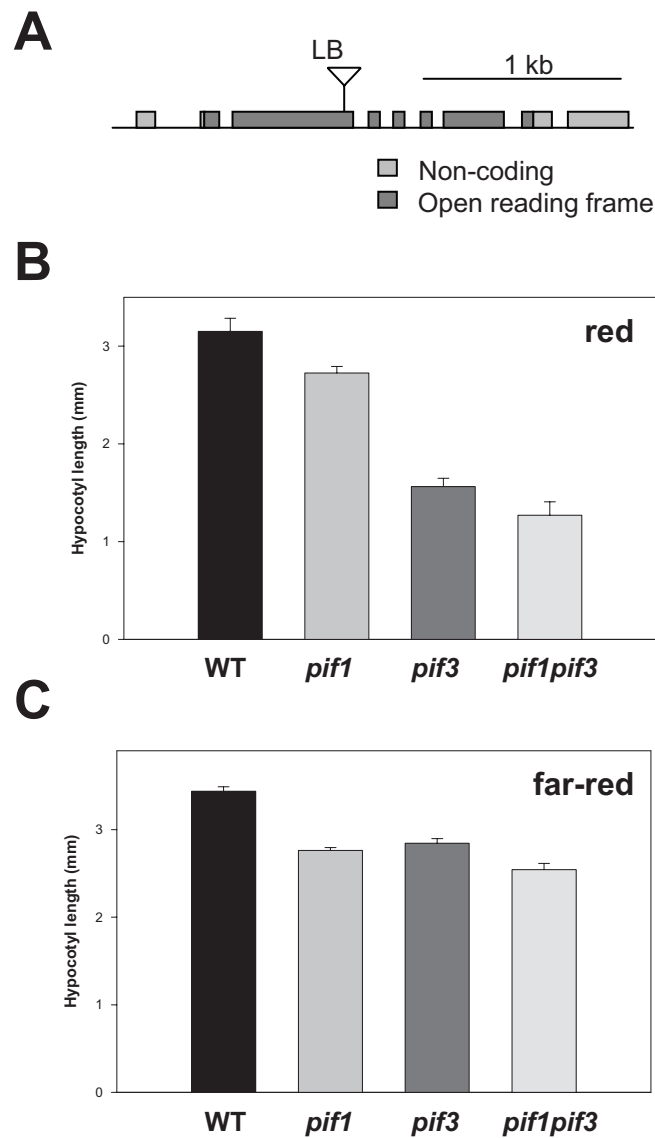

**Fig. S1.** Characterization of new *pif1* and *pif3* mutants. (A) The *PIF1* gene and position of *pif1-101* insertion. (B and C) Hypocotyl lengths of *pif1-101*, *pif3-1*, and *pif1pif3* double mutants grown in  $80 \mu\text{mol}\cdot\text{m}^{-2}\cdot\text{s}^{-1}$  red (B) or  $10 \mu\text{mol}\cdot\text{m}^{-2}\cdot\text{s}^{-1}$  far-red (C) light for 5 d after 1 d in the dark. Values shown are the mean  $\pm$  SE of 3 independent experiments.



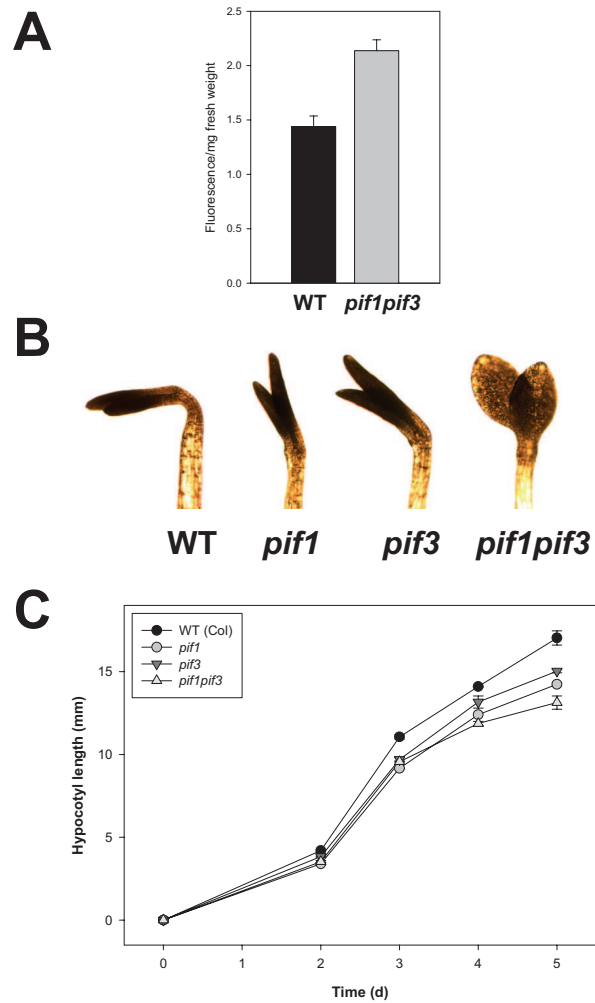

**Fig. S3.** Phenotype of *pif* mutant seedlings grown in complete darkness. Seedlings were grown as in Fig. 1 except that no 2-h WL pretreatment was given. (A) Pchlde accumulation in WT and *pif1pif3* double mutant seedlings after 5 d in the dark. (B) Cotyledons of WT and *pif* mutant seedlings after 4 d in the dark. (C) Hypocotyl growth of WT and *pif* mutant seedlings in darkness. Values shown in (A) and (C) are the mean  $\pm$  SE of 4 and 3 independent experiments, respectively. Photographs shown in B are representative and at the same scale.

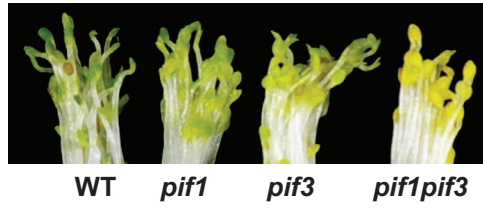

**Fig. S4.** Seedling phenotype of WT, *pif1*, *pif3*, and *pif1pif3* double mutants after 4 d in the dark and 1 d of WL ( $110 \mu\text{mol}\cdot\text{m}^{-2}\cdot\text{s}^{-1}$ ).

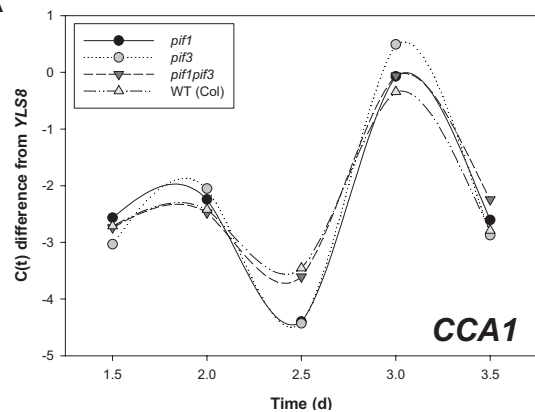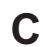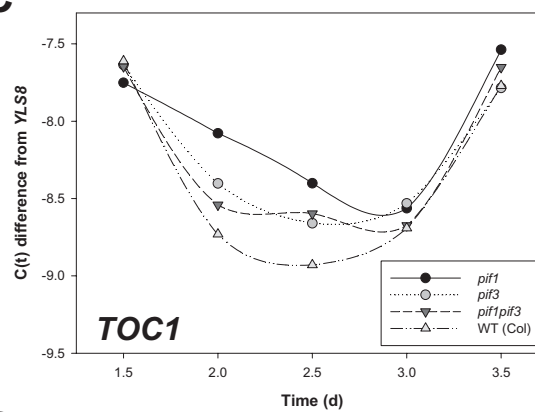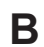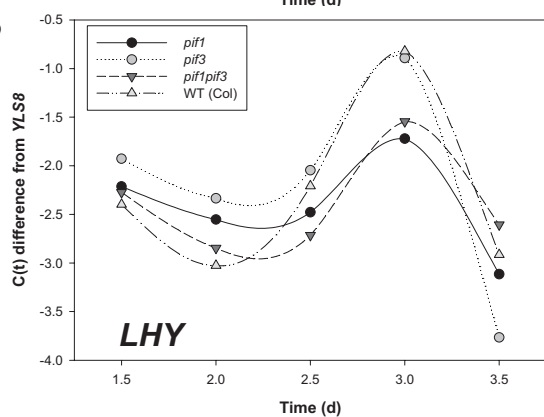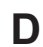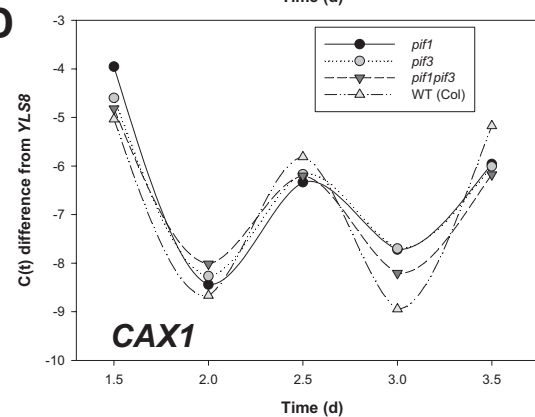

**Fig. S5.** The *pif1*, *pif3*, and *pif1pif3* mutations do not affect circadian expression of clock genes. Real-time PCR data showing expression of the *CCA1* (A), *LHY* (B), *TOC1* (C), and *CAX1* (D) genes in WT and the *pif1*, *pif3*, and *pif1pif3* mutants for up to 3.5 d in the dark. Data are presented as the *C*(*t*) difference to the control gene *YLS8*. Gene expression values shown are the mean  $\pm$  SE of 3 independent experiments.

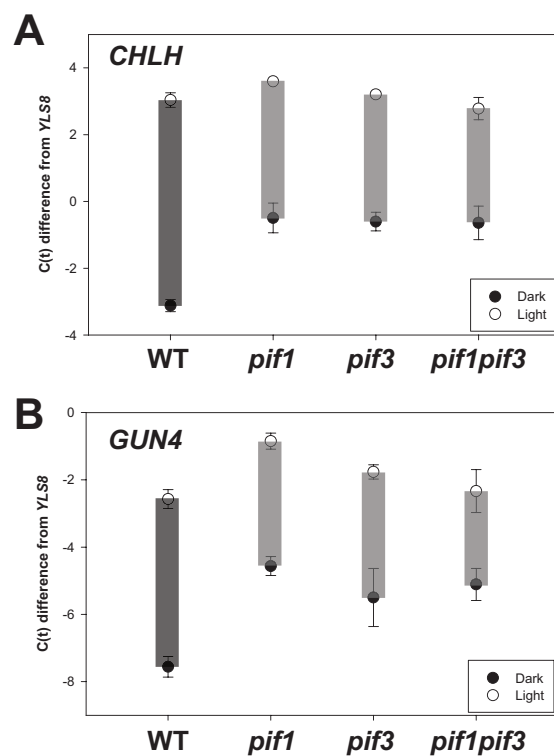

**Fig. S6.** Expression of tetrapyrrole synthesis genes in *pif* mutant seedlings after light treatment. Expression of the *CHLH* (A) and *GUN4* (B) genes in WT, *pif1*, *pif3*, and *pif1pif3* mutants after either 3 d in the dark (filled symbols) or 2 d in the dark followed by 1 d of WL ( $110 \mu\text{mol}\cdot\text{m}^{-2}\cdot\text{s}^{-1}$ ; open symbols). Vertical bars indicate the level of light induction. Data were determined by real-time PCR and presented as C(t) difference from the *YLS8* control gene. Values shown are the mean  $\pm$  SE of  $\geq 3$  independent experiments.
